# Supplementary material for: Management of invading pathogens should be informed by epidemiology rather than administrative boundaries
Source: PubMed Central journal article supplement (PMC4767045; doi:10.1016/j.ecolmodel.2015.12.014), 2016-03-24
Supplement: mmc1.pdf [file mmc1.pdf]

# Management of invading pathogens should be informed by epidemiology rather than administrative boundaries

## Supplementary Material

Robin N. Thompson<sup>a,\*</sup>, Richard C. Cobb<sup>b</sup>, Christopher A. Gilligan<sup>a</sup>, Nik J. Cunniffe<sup>a</sup>

<sup>a</sup>Department of Plant Sciences, University of Cambridge, Downing Street, Cambridge CB2 3EA, UK

<sup>b</sup>UC Davis Department of Plant Pathology, One Shields Avenue, Davis, CA 95616, USA

\*Corresponding author. Present address: Department of Zoology, The Tinbergen Building, South Parks Road, Oxford OX1 3PS, UK. E-mail address: [robin.thompson@lmh.ox.ac.uk](mailto:robin.thompson@lmh.ox.ac.uk) (R.N. Thompson).

### Figure

Figure S1. The optimal percentage of the county to quarantine ( $p^*$ ) as a function of the cost of quarantine ( $\eta$  per host unit in the quarantine region per year) and the epidemiological parameters: (a) rate of infection ( $\beta$ ); (b) scale of pathogen dispersal ( $\alpha_2$ ). In (a),  $\beta$  is incremented in steps of size  $0.001 \text{ month}^{-1}$  and  $\eta$  in steps of size 0.067. To reduce the computational resources required to produce these results, instead of running new simulations for each  $(\eta, \beta)$  pair, a database of 1000 simulations is produced for each  $\beta$  value examined. For each  $(\eta, \beta)$  pair, 500 simulations are then sampled out of the 1000 reference simulations. Subfigure (b) is created similarly, but with  $\alpha_2$  incremented in steps of 100 meters.

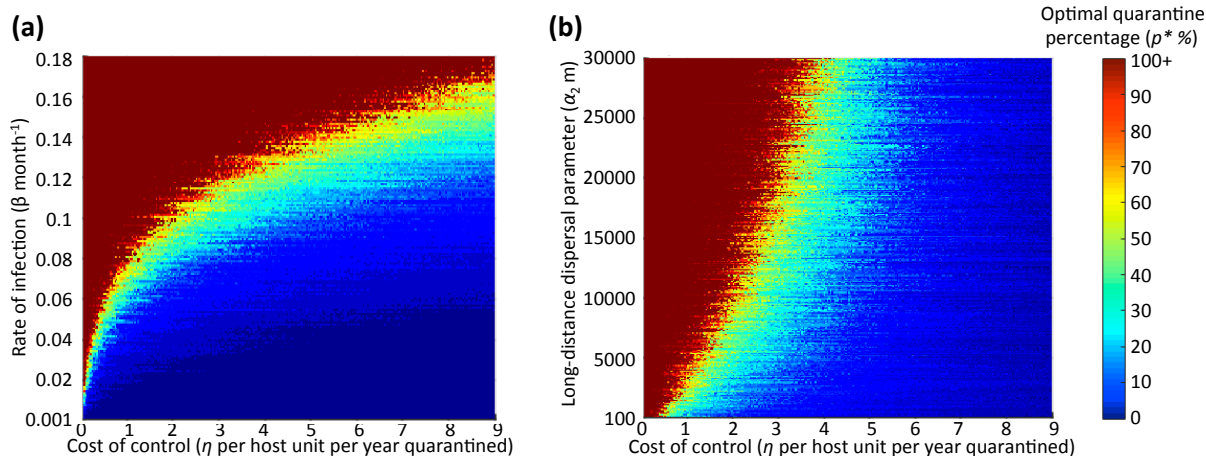

## Table

Table S1. Table of parameters for the metapopulation disease spread model.

| Parameter         | Meaning                                                                                                                            | Value used in simulations                                  |
|-------------------|------------------------------------------------------------------------------------------------------------------------------------|------------------------------------------------------------|
| $W$               | Horizontal extent of county                                                                                                        | 50 km                                                      |
| $M + I$           | Number of patches in the county                                                                                                    | 1000                                                       |
| $L$               | Number of nearby patches considered on each side of county                                                                         | 200                                                        |
| $S_i(t)$          | Number of susceptible host units in patch $i$ at time $t$                                                                          | Initially, all host units in the landscape are susceptible |
| $I_i(t)$          | Number of infected host units in patch $i$ at time $t$                                                                             | Initially no host units in the landscape are infected      |
| $N_i = S_i + I_i$ | Number of host units in patch $i$                                                                                                  | Sampled from Uniform[6,14] distribution                    |
| $\beta$           | Rate of infection                                                                                                                  | 0.1 month $^{-1}$ (except where stated)                    |
| $\beta Z \psi_j$  | Rate of primary infection on susceptible host units in patch $j$ (where $Z$ is strength of infection source outside the landscape) | $Z = 400$ host units, $\psi_j$ given in text               |

|                  |                                                                                                              |                                                                        |
|------------------|--------------------------------------------------------------------------------------------------------------|------------------------------------------------------------------------|
| $\beta\phi_{ij}$ | Rate of secondary infection between infected host units in patch $i$ and susceptible hosts in patch $j$      | $\phi_{ij}$ given in text                                              |
| $\gamma$         | Proportion of short-range dispersal                                                                          | 0.99                                                                   |
| $\alpha_1$       | Spatial scale of short-range spread                                                                          | 20 m                                                                   |
| $\alpha_2$       | Spatial scale of long-range spread                                                                           | 10 km (except where stated)                                            |
| $N_{\max}$       | Maximum number of host units that any patch can accommodate                                                  | 20                                                                     |
| $d$              | Distance between primary infection source and landscape                                                      | 30 km                                                                  |
| $\eta$           | Cost of quarantine per host unit per year                                                                    | See figures                                                            |
| $T$              | Timescale over which quarantine is applied, which begins when the disease is first detected in the landscape | 24 months                                                              |
| $\lambda$        | Average rate at which each host unit is traded out of the county                                             | $1/12 \text{ month}^{-1}$                                              |
| $q$              | Probability of a traded infected host unit avoiding disease detection in the trade network                   | 0.1                                                                    |
| $\rho$           | Proportion of host units in nurseries                                                                        | 0.01                                                                   |
| $A$              | Cost due to quarantine of further counties if disease escapes                                                | 10,000                                                                 |
| $\tau_n$         | Average time after infection that disease in nursery hosts is detected                                       | 6 months                                                               |
| $\tau_w$         | Average time after infection that disease in hosts in the wider environment is detected                      | 36 months                                                              |
| $r$              | Average rate at which infected hosts are detected                                                            | $\frac{1}{\tau_n}\rho + \frac{1}{\tau_w}(1 - \rho) \text{ month}^{-1}$ |
